# Supplementary material
Source: PubMed Central journal article supplement (PMC3948260)
Supplement: 1401556111_pnas.201401556SI.pdf [file 1401556111_pnas.201401556SI.pdf]

# Supporting Information

Hartmann et al. 10.1073/pnas.1401556111

## SI Materials and Methods

**Cell Lines, Cell Culture, and Reagents.** HEK293 (Invitrogen) and U2-OS osteosarcoma cells (kind gift of Per S. Holm, Technische Universität München) were cultured in DMEM (Invitrogen) supplemented with 10% FCS and 1% penicillin/streptomycin (PAN-Biotech). Cells (U2-OS) stably expressing the vectors pBABE, pBABE-LT (large tumor antigen), or pBABE-LT<sup>Δ69-83</sup> were generated by retroviral infection followed by antibiotic selection. [<sup>35</sup>S]Methionine/cysteine was purchased from Hartmann Analytic. All other chemicals were purchased from Sigma-Aldrich, Carl Roth, or AppliChem unless otherwise noted.

**Plasmids and siRNA.** V5 IRS1, myc-Fbw8, and flag-CUL7 plasmids were described previously (1). All SV40 LT- or LT<sup>Δ69-83</sup>-expressing vectors (LT/ΔLT; HA-, V5-tagged) were cloned in pcDNA3.1 and pBABE-puro vectors. DNA sequences of SV40 LT for cloning were kindly provided by Jim Manfredi (Mount Sinai School of Medicine). The CUL7 binding-deficient mutant LT<sup>Δ69-83</sup> was generated by site-directed mutagenesis. The pBABE-puro vector containing CUL7 was a kind gift of James DeCaprio (Harvard Medical School, Cambridge, MA). The HA-tagged full-length and mutant CUL7-expressing plasmids were a kind gift of Azad Bonni (Harvard Medical School, Cambridge, MA). Three different siRNAs directed against Cul7 with comparable efficiencies

(5'-GAC UUU GUG CCA CGC UAC U-3'; 5'-CAA UAC CUA UGC UUU GUA U-3'; 5'-GUU GAG UAG UCC UGA UUA U-3') and a nontargeting control siRNA (siRNA universal negative control 1) were purchased from Sigma-Aldrich. Plasmid DNA and siRNA were transfected using Lipofectamine 2000 reagent (Invitrogen).

**Immunoprecipitations, Western Blot Analysis, and Antibodies.** Immunoprecipitations and Western blot analyses were performed as described (1, 2). The following antibodies were used: c-myc (9E10; Santa Cruz Biotechnology), HSP90α/β (F-8; Santa Cruz Biotechnology), P-AKT (pS473, 9271; Cell Signaling), AKT (9272; Cell Signaling), P-Erk (pT202/pY204, 9101; Cell Signaling), Erk (4696; Cell Signaling), CUL7 (HPA030095; Sigma-Aldrich), flag (M2, F3165; Sigma-Aldrich), V5 (46-0705; Invitrogen), and HA (clone HA.11; HiSS Diagnostics).

**Quantitative Real-Time PCR.** Total RNA was extracted using the RNeasy Mini Kit (Qiagen), and reverse transcription (RT-PCR) was carried out with SuperScript II Reverse Transcriptase and oligo dT primers (Invitrogen). Levels of cDNA were quantified using SYBR Green I (Lonza) in an ABI PRISM 7900HT cyclor (Applied Biosystems).

1. Xu X, et al. (2008) The CUL7 E3 ubiquitin ligase targets insulin receptor substrate 1 for ubiquitin-dependent degradation. *Mol Cell* 30(4):403-414.

2. Kasper JS, Kuwabara H, Arai T, Ali SH, DeCaprio JA (2005) Simian virus 40 large T antigen's association with the CUL7 SCF complex contributes to cellular transformation. *J Virol* 79(18):11685-11692.

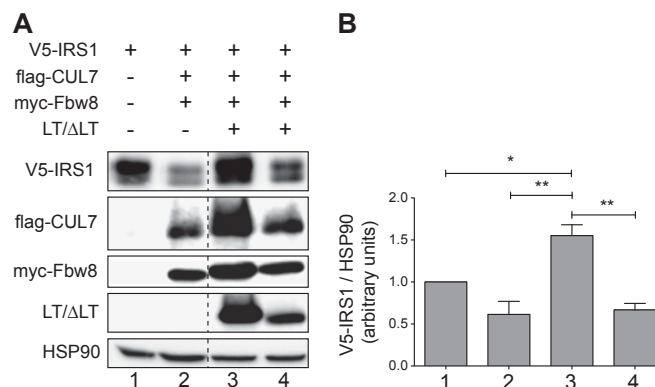

**Fig. S1.** CUL7/Fbw8-mediated degradation of IRS1 is impaired by SV40 LT in HEK293 cells. (A) HEK293 cells were transfected with empty vector or plasmids encoding V5-tagged IRS1, flag-CUL7, myc-Fbw8, LT (lane 3), and LT<sup>Δ69-83</sup> (lane 4; designated ΔLT). Lysates were separated by SDS/PAGE and subjected to Western blot analysis. (B) Quantification of IRS1 protein level.  $n = 3$ ; \* $P < 0.05$ , \*\* $P < 0.01$ . Data are presented as means  $\pm$  SEM.

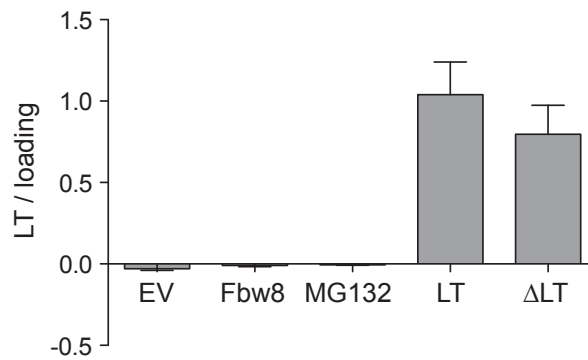

**Fig. S2.** Protein expression level of LT and LT<sup>Δ69-83</sup> in HEK293 cells. HEK293 cells were transfected with empty vector (EV) or plasmids encoding V5-IRS1, myc-Fbw8, HA-LT, and HA-CUL7 binding-deficient mutant LT<sup>Δ69-83</sup>. Where indicated, cells were treated with the proteasomal inhibitor MG132 (10 μM) for 8 h. Lysates were separated by SDS/PAGE and subjected to Western blot analysis. *n* = 8. Data are presented as means ± SEM.

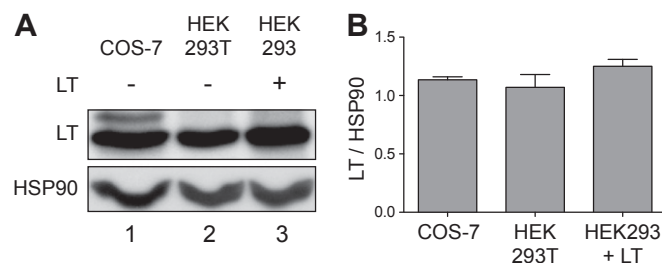

**Fig. S3.** Comparison of LT protein expression levels in different cell lines. (A) Whole-cell lysates of COS-7 cells, HEK293T cells, or HEK293 cells transiently expressing LT were subjected to SDS/PAGE and immunoblot analysis. (B) Quantification of LT protein level. Data are presented as means ± SEM.

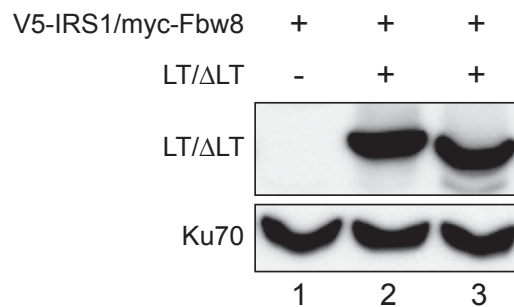

**Fig. S4.** Protein expression level of LT and LT<sup>Δ69-83</sup> in <sup>35</sup>S pulse-chase experiments. HEK293 cells were transfected with plasmids encoding V5-IRS1, myc-Fbw8, HA-LT, and HA-LT<sup>Δ69-83</sup>. Whole-cell lysates were prepared immediately before <sup>35</sup>S labeling, separated by SDS/PAGE, and subjected to Western blot analysis.

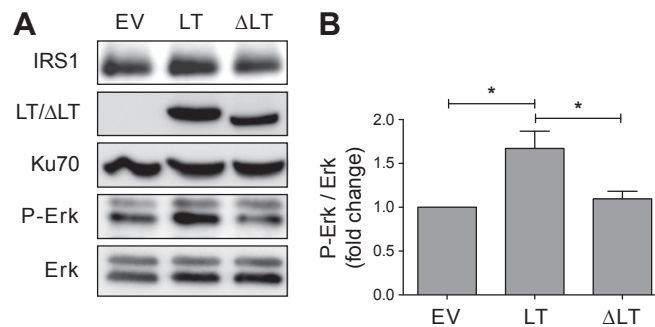

**Fig. S5.** Activation of the Erk MAPK signaling pathway upon LT expression in HEK293 cells. (A) HEK293 cells were transfected with empty vector or plasmids encoding LT or LT<sup>Δ69-83</sup>. Forty-eight hours posttransfection, lysates were subjected to SDS/PAGE and Western blot analysis. (B) Quantification of Erk MAPK activation (as evidenced by Erk<sup>PT202/pY204</sup> phosphorylation). *n* = 4; \**P* < 0.05. Data are presented as means ± SEM.

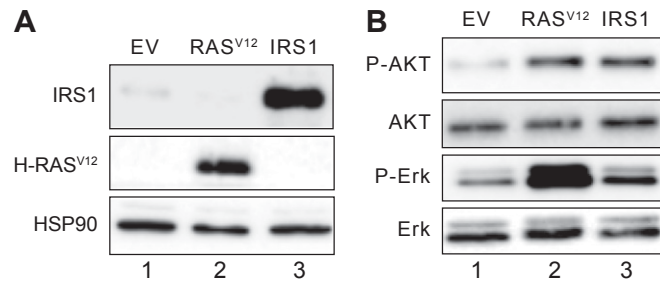

**Fig. S6.** Enhanced activation of the phosphatidylinositol-3-kinase (PI3K)/AKT and Erk MAPK signaling pathways upon ectopic IRS1 expression. Primary human diploid fibroblasts (IMR90 cells) were infected with amphotropic retroviruses (pBabe-puro) expressing empty vector, IRS1, or H-RAS<sup>V12</sup>. Cell lysates were subjected to SDS/PAGE and immunoblot analysis. (A) Protein expression levels of IRS1 and H-RAS<sup>V12</sup>. (B) Activation of PI3K/AKT and Erk MAPK signaling pathways (as evidenced by AKT<sup>P5473</sup> and Erk<sup>P1202/pY204</sup> phosphorylation).

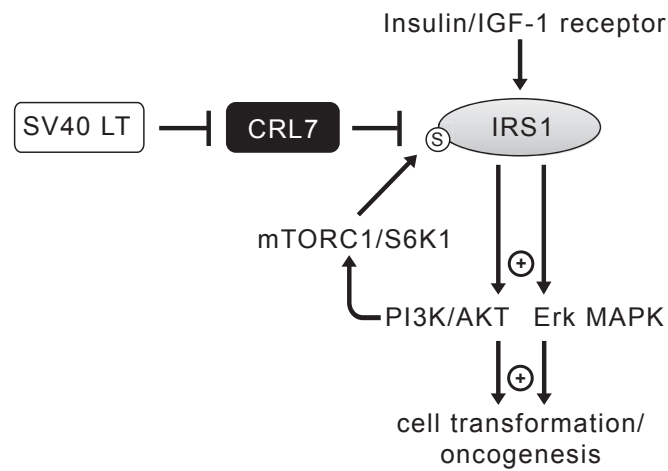

**Fig. S7.** Model for the role of LT interaction with CUL7. Cullin-RING E3 ubiquitin ligase 7 (CRL7) regulates PI3K/AKT and Erk MAPK signaling pathways via ubiquitin-mediated degradation of IRS1 that is dependent on a negative feedback loop via mTORC1/S6K1. Binding of LT to CUL7 inhibits CRL7 ubiquitin ligase function, resulting in desuppression and activation of IRS1 downstream signaling pathways. This may contribute to cell transformation and oncogenesis by SV40.
